# Supplementary material for: Contact patterns of UK home delivery drivers and their use of protective measures during the COVID-19 pandemic: a cross-sectional study
Source: PubMed Central journal article supplement (PMC10314008; doi:10.1136/oemed-2022-108646), 2023-04-13
Supplement: oemed-2022-108646supp001.pdf [file oemed-2022-108646supp001.pdf]

## Supplementary Material - Contact patterns of UK home delivery drivers and their use of protective measures during the COVID-19 pandemic: a cross-sectional study

Jessica RE Bridgen; Centre for Health Informatics, Computing and Statistics, Lancaster Medical School, Lancaster University, Lancaster, UK

Hua Wei; School of Health Sciences Centre, University of Manchester, Manchester, UK

Carl Whitfield; Immunity and Respiratory Medicine, University of Manchester, Manchester, UK

Yang Han; Department of Mathematics, University of Manchester, Manchester, UK

Ian Hall; Department of Mathematics, University of Manchester, Manchester, UK

Chris P Jewell; Department of Mathematics and Statistics, Lancaster University, Lancaster, UK

Martie JA van Tongeren; Academic Health Sciences Centre, University of Manchester, Manchester, UK

Jonathan M Read; Centre for Health Informatics, Computing and Statistics, Lancaster Medical School, Lancaster University, Lancaster, UK

[jonathan.read@lancaster.ac.uk](mailto:jonathan.read@lancaster.ac.uk) (corresponding author)

### Contents

|                              |          |
|------------------------------|----------|
| <b>Tables .....</b>          | <b>2</b> |
| <b>Survey questions.....</b> | <b>5</b> |

## Tables

**Table S1:** Participants' employment information. N is the number of participants who provided a response to the question.

|                                                                 | Number of participants (%) |
|-----------------------------------------------------------------|----------------------------|
| Current employment situation (N = 162)                          |                            |
| Self-employed and completely independent                        | 88 (54.3%)                 |
| Self-employed but receiving certain workers benefits            | 14 (8.6%)                  |
| Employed by one company - full time                             | 46 (28.4%)                 |
| Employed by one company - part time                             | 11 (6.8%)                  |
| Employed by multiple companies                                  | 3 (1.9%)                   |
| No response                                                     | 0 (0.0%)                   |
| Current weekly working hours (N = 162) <sup>†</sup> *           |                            |
| 0                                                               | 0 (0.0%)                   |
| 1 - 10                                                          | 6 (3.7%)                   |
| 11 - 20                                                         | 17 (10.5%)                 |
| 21 - 30                                                         | 17 (10.5%)                 |
| 31 - 40                                                         | 44 (27.2%)                 |
| 41 - 50                                                         | 42 (25.9%)                 |
| 51 or more                                                      | 36 (22.2%)                 |
| In receipt of statutory sick leave pay (N = 151) <sup>†</sup> * |                            |
| Yes                                                             | 38 (25.2%)                 |
| No                                                              | 103 (68.2%)                |
| Not sure                                                        | 10 (6.6%)                  |

<sup>†</sup> Question required a response from the participant.

\* As a delivery driver

**Table S2:** Adjusted incidence rate ratios for number of customer contacts per shift by select variables.

|                                                  | Multivariable analysis                   |         |
|--------------------------------------------------|------------------------------------------|---------|
|                                                  | Adjusted Incidence Rate Ratio<br>(95%CI) | p-value |
| Age                                              |                                          |         |
| 18-29                                            | 1.65 (1.07-2.60)                         | 0.020   |
| 30-39                                            | 1.13 (0.77-1.68)                         | 0.525   |
| 40-49                                            | 1.64 (1.15-2.34)                         | 0.004   |
| 50-59                                            | 1.00                                     | -       |
| 60-69                                            | 1.00 (0.60-1.75)                         | 0.986   |
| Sex                                              |                                          |         |
| Female                                           | 1.00                                     | -       |
| Male                                             | 0.98 (0.70-1.36)                         | 0.910   |
| Employment type                                  |                                          |         |
| Self-employed and independent                    | 1.00                                     | -       |
| Self-employed and receiving some benefits        | 1.19 (0.74-1.97)                         | 0.456   |
| Employed by one company - full time              | 0.66 (0.47-0.94)                         | 0.019   |
| Employed by one company - part time              | 0.77 (0.39-1.58)                         | 0.404   |
| Employed by multiple companies                   | 0.97 (0.40-2.80)                         | 0.955   |
| Furthest distance from depot to delivery (miles) |                                          |         |
| 0-9                                              | 1.00                                     | -       |
| 10-19                                            | 1.18 (0.79-1.75)                         | 0.422   |
| 20-99                                            | 1.23 (0.83-1.82)                         | 0.274   |
| 100-499                                          | 1.07 (0.60-1.91)                         | 0.805   |
| Weekly working hours                             |                                          |         |
| 1-10                                             | 0.47 (0.24-1.00)                         | 0.036   |
| 11-20                                            | 0.55 (0.32-0.99)                         | 0.018   |
| 21-30                                            | 0.44 (0.28-0.71)                         | 0.001   |
| 31-40                                            | 1.00                                     | -       |
| 41-50                                            | 0.95 (0.63-1.43)                         | 0.806   |
| 51+                                              | 0.98 (0.65-1.48)                         | 0.918   |
| Items normally delivered                         |                                          |         |
| Small parcels only                               | 1.00                                     | -       |
| Large items only                                 | 1.24(0.55-3.13)                          | 0.600   |
| Small parcels and large items                    | 0.88(0.59-1.34)                          | 0.541   |
| Groceries only                                   | 0.34(0.18-0.64)                          | 0.001   |

|                                  |                 |        |
|----------------------------------|-----------------|--------|
| Takeaway only                    | 0.19(0.11-0.37) | <0.001 |
| Other items only                 | 0.43(0.24-0.80) | 0.003  |
| Other delivery type combinations | 0.58(0.38-0.93) | 0.014  |

## Survey questions

Q1a. Are you aged 18 or over?

Yes

No

Q1b. Do you work as a home delivery driver in the UK? (including mail, parcels, homework, takeaway, groceries etc.)

Yes

No

Q1c.

**Please make sure you agree to the following before continuing with the survey:**

You currently live in the UK;

You are a home delivery driver;

You have read the [Participant Information Sheet](#) and fully understand what is expected of you within this study;

Your participation is voluntary, and you are aware that you can stop the survey at any point; You consent to Lancaster University keeping the anonymised data for a period of 10-years after the study has finished;

**I consent to taking part in the CoCoNet: Home Delivery Driver study**

Q2. Where in the UK do you currently live?

England

Northern Ireland

Scotland

Wales

I do not live in the UK

Q3. What is your age?

18 - 29 years old

30 - 39 years old

- 40 - 49 years old
- 50 - 59 years old
- 60 - 69 years old
- 70 - 79 years old
- Aged 80 or over

Q4. What is your sex?

The answer you give can be different from what is on your birth certificate.

- Female
- Male
- Prefer not to say

Q5. Which of the following best describes your ethnicity?

- English / Welsh / Scottish / Northern Irish / British
- Irish
- Gypsy or Irish Traveller
- Any other White background
- White and Black Caribbean
- White and Black African
- White and Asian
- Any other Mixed / Multiple ethnic background
- Indian
- Pakistani

- Bangladeshi
- Chinese
- Any other Asian background
- African
- Caribbean
- Any other Black / African / Caribbean background
- Arab
- Any other ethnic group
- Prefer not to say

Q6. What is the first part of your home postcode?

*For example, if your home postcode was LA1 4YW then you would enter LA1.*

---

Q7. What is your highest level of education?

- Higher education and professional/vocational equivalents
- A levels, vocational level 3 and equivalents
- Trade apprenticeships
- GCSE/ O level grade A\*-C, vocational level 2 and equivalents
- Qualifications at level 1 and below
- Other qualifications
- No qualifications
- Not sure

Q8. Are you self-isolating or shielding because of COVID-19?

*A vulnerable individual here refers to a clinically extremely vulnerable person.*

- I am not self-isolating or shielding
  - Self Isolating - I have symptoms of COVID
  - Self Isolating - Someone in my household has symptoms of COVID
  - Self Isolating - Someone in my support bubble has symptoms of COVID
  - Self Isolating - Someone I have been in contact with has symptoms of COVID
  - Self Isolating - Told to do so by a contact tracer
  - Self Isolating - Told to do so by a contact tracing phone app
  - Self Isolating - In travel-related quarantine
  - Shielding - I am a vulnerable individual
  - Shielding - I live with a vulnerable individual
  - Other - *please do not include any identifying information*
- 

Not sure

Q9. Have you ever had to self-isolate due to COVID-19 infection (either suspected or confirmed)?

- Yes
- No

Q10. In which month(s) have you had to self-isolate? Tick all that apply.

- March 2020
- April 2020
- May 2020
- June 2020
- July 2020
- August 2020
- September 2020
- October 2020
- November 2020
- December 2020



- January 2021
- February 2021
- March 2021

Q11. Have you ever tested positive for COVID-19?

- Yes
- No

Q12. In which month(s) did you test positive? Tick all that apply.

- March 2020
- April 2020
- May 2020
- June 2020
- July 2020
- August 2020
- September 2020
- October 2020
- November 2020
- December 2020
- January 2021
- February 2021
- March 2021

Q13. How many other people currently live with you at home?

- 0 - I live alone
- 1
- 2
- 3
- 4
- 5 or more

Q14. How many people of each age group live with you at home?

*Do not include yourself.*

*Drop down options of 0, 1, 2, 3, 4, 5 or more for each age group.*

- 0 - 9 year olds
- 10 - 19 year olds
- 20 - 29 year olds
- 30 - 39 year olds
- 40 - 49 year olds
- 50 - 59 year olds
- 60 -69 year olds
- 70 - 79 year olds
- Aged 80 or over

Q15. What do you normally deliver?

- Letters and mail
- Small parcels
- Large items (e.g. large appliances, furniture)
- Takeaway food
- Groceries
- Other - please specify \_\_\_\_\_

Q16. What is your current employment situation?

- Self-employed and completely independent
- Self-employed but receiving certain workers benefits (e.g. holiday pay, sick pay). Please specify - do not include any identifying information  
\_\_\_\_\_
- Employed by one company - full time
- Employed by one company - part time
- Employed by multiple companies

Q17. How many hours do you currently work as a delivery driver per week?

- 0 hours
- 1 - 10 hours
- 11 - 20 hours

- 21 - 30 hours
- 31 - 40 hours
- 41 - 50 hours
- 51 hours or more

Q18. How many deliveries did you make during your last shift?

\_\_\_\_\_

Q19. When was the last shift you worked as a delivery driver?

- This week
- Earlier this month
- Last month
- 2 months ago or more

Q20. Did you use your own vehicle to make deliveries on your last shift?

- Yes
- No

Q21. During your last shift, how many customers did you meet face-to-face?

\_\_\_\_\_

Q22. On your last shift, which types of face-to-face contact did you make with customers? Tick all that apply.

- Brief face-to-face interaction with customer (less than 5 minutes)
- Prolonged face-to-face interaction with customer (more than 5 minutes)
- Entered a customer's property (e.g. for installation or to drop off a heavy item)
- Hand signature required from customer
- Other, please specify \_\_\_\_\_

Q23. Were you able to maintain social distance (at least 2 metres apart) from all of the customers you met on your last shift?

- Yes, all of the time
- More than half of the time
- Less than half of the time
- No, none of the time
- Not sure

Q24. During your last shift, how many people did you meet in the location where you collect items for delivery (e.g. depots or food outlets)?

*Only include those you had a face-to-face conversation with.*

---

Q25. Were you able to maintain social distance (at least 2 metres apart) from everyone you met in the location where you collect items for delivery last shift?

- Yes, all of the time
- More than half of the time (2)
- Less than half of the time
- No, none of the time
- Not sure

Q26. During your last working week, what was the furthest distance you travelled from a collection point (at a depot or restaurant) to a delivery address?

- 0 - 9 miles
- 10 - 19 miles
- 20 - 99 miles
- 100 - 499 miles
- 500 miles or more

Q27. During your last working week, did you share a vehicle with a colleague to make deliveries? (e.g. for large items)

Yes

No

Q28. During your last working week, did you always share a vehicle with the same colleague?

Yes

No

Q29. What measures have you taken to prevent infection when sharing a vehicle? Tick all that apply.

- Keeping windows open
- Wearing a facemask
- Using hand sanitiser
- Other, please specify \_\_\_\_\_

Q30. On your last shift, did you use any Personal Protective Equipment (PPE)? Tick all that apply.

- Facemask
- Gloves
- Hand sanitiser
- Other, please specify \_\_\_\_\_

Q31. Was the PPE provided by your employers or contracting companies/platforms?

Yes

No

Not sure

Q32. Do you think they are effective protection?

Yes

No

Not sure

Q33. Do you think you have adequate knowledge and information about workplace COVID-19 risk?

Yes

No

Q34. Where do you learn about workplace COVID-19 risk? Tick all that apply.

- Company/platform communications
- Government website
- News and social media
- Other, please specify \_\_\_\_\_

Q35. Do you receive statutory sick leave pay for your delivery occupation?

- Yes
- No
- Not sure

Q36. How would you cover your living expenses if you had to take time off work due to being ill with COVID-19 or COVID-19 symptoms? Tick all that apply.

- Special COVID-19 funding scheme provided by the contracting companies/platforms
- Government self-employment income support scheme
- Social benefits
- Other, please specify \_\_\_\_\_

Q37. Since March 2020, have you worked whilst being ill with COVID-19 symptoms, or with a member of your household having a suspected or confirmed case of COVID-19?  
*COVID-19 symptoms include: a high temperature, a new continuous cough, a loss or change to your sense of smell or taste*

- Yes
- No
- Not sure

Q38. What was the main reason you still went to work? Tick all that apply.

- Financial reasons
- Unable to find someone to cover my shifts
- Asked to or encouraged to carry on working by my employers
- Other, please specify \_\_\_\_\_
